# Supplementary material for: Optimum Green Synthesis, Characterization, and Antibacterial Activity of Silver Nanoparticles Prepared from an Extract of Aloe fleurentinorum
Source: Hindawi journal article supplement (doi:10.1155/2024/2804165), 2024-01-01
Supplement: f1 [file 2804165.f1.docx]

|  |
| --- |
| **Figure S1.** The Absorbance AgNPs based on their volume ratio |
|  |
| **Figure S2.** TheAbsorbance of AgNPs based on pH values. |

**Supplementary Materials**

|  |
| --- |
| **Figure S3.** The Absorbance of AgNPs at different temperatures. |

|  |
| --- |
| **Figure S4.** The Absorbance of AgNPs based on reaction times |

**Figure S5.** Tauc’s plot for the energy band gap of the AgNPs.

|  |
| --- |
| **Figure S6.** FTIR of eco-friendly synthesized AgNPs. |

| | **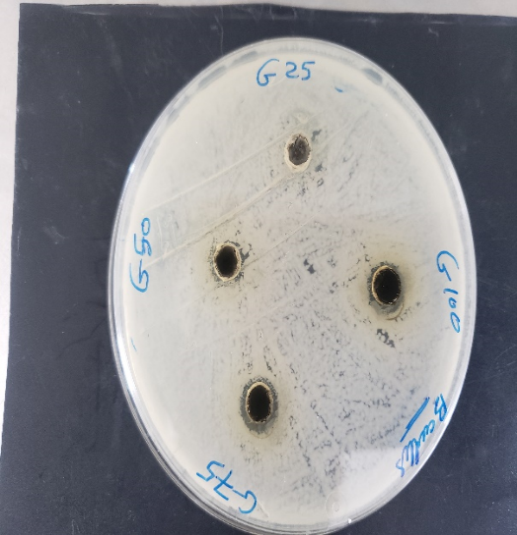** | 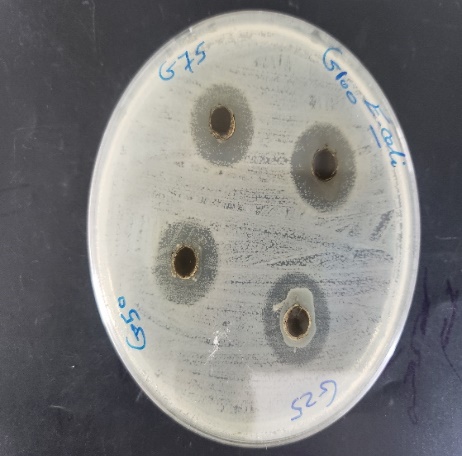 | | --- | --- | | **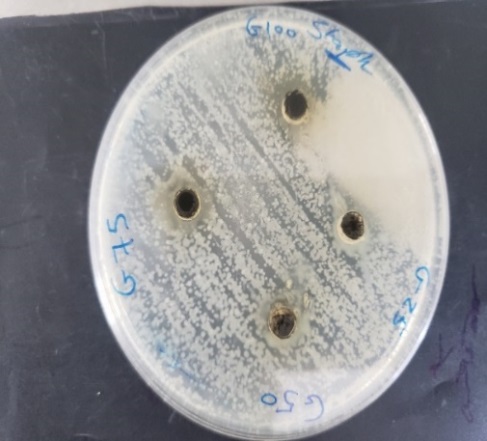** | 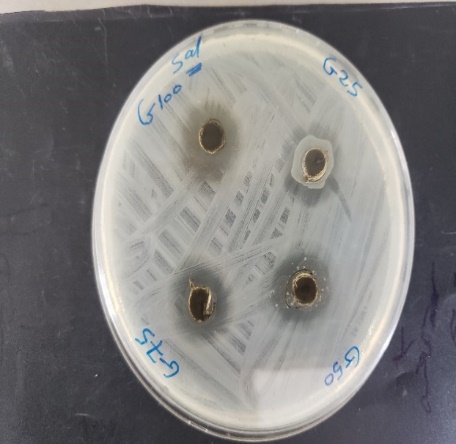 | | 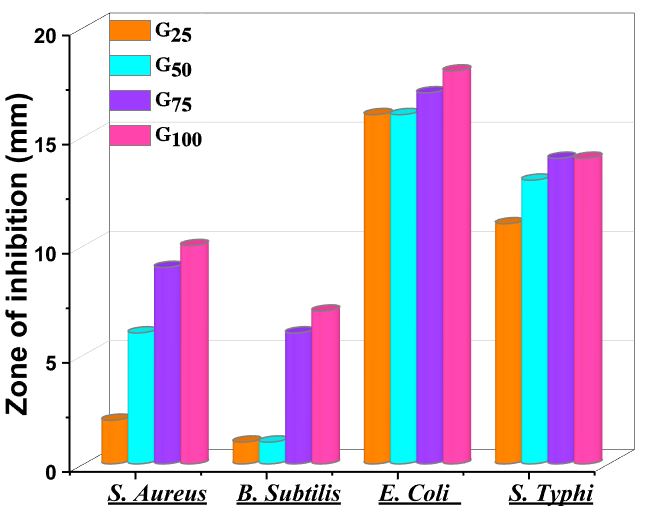 | | | **Figure S7.**The test of the synthesized AgNps antibacterial activities against Bacillus Subtilis (a), Staphylococcus Aureus (b) Escherichia Coli(c) Salmonella Typhi (d) and the Inhibtion zones of green synthesized AgNPs In different concentrations(e). | | |
| --- | --- | --- | --- | --- | --- | --- | --- | --- |
|  |
